# Supplementary material for: Antagonistic Pleiotropy in the Bifunctional Surface Protein FadL (OmpP1) during Adaptation of Haemophilus influenzae to Chronic Lung Infection Associated with Chronic Obstructive Pulmonary Disease
Source: PubMed Central journal article supplement (PMC6156194; doi:10.1128/mbio.01176-18), 2018-09-25

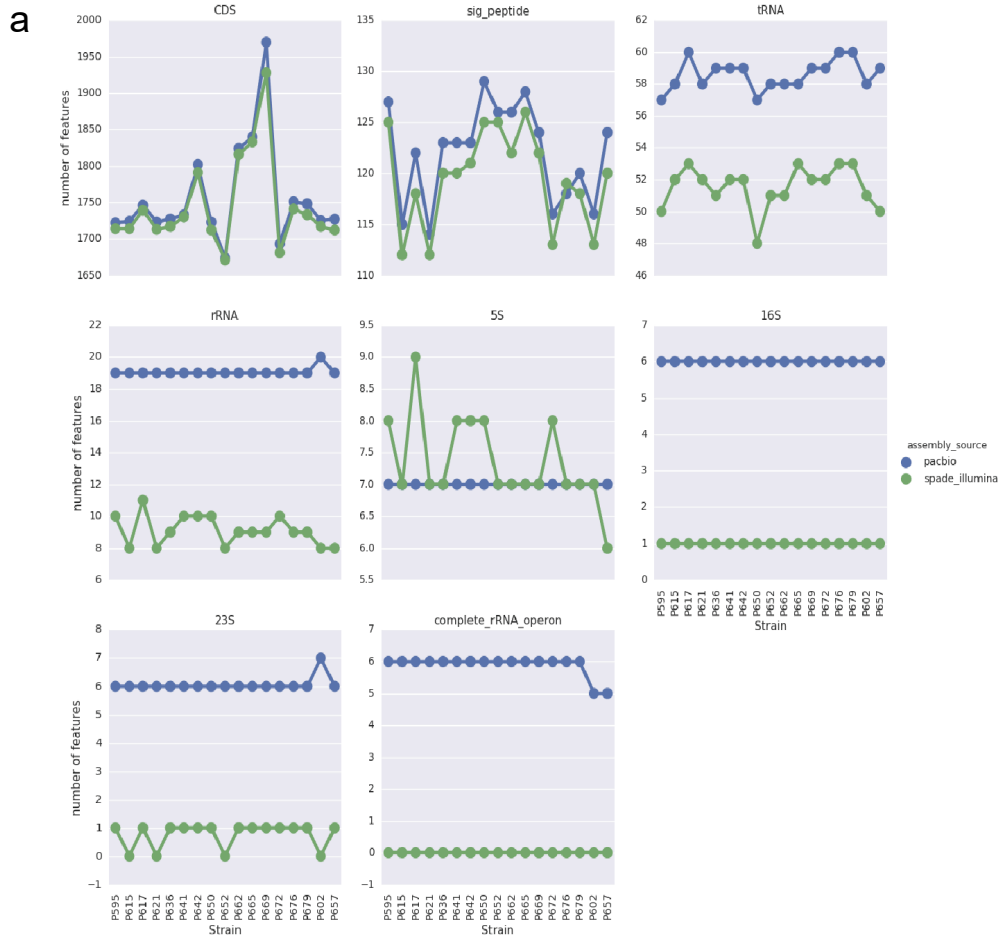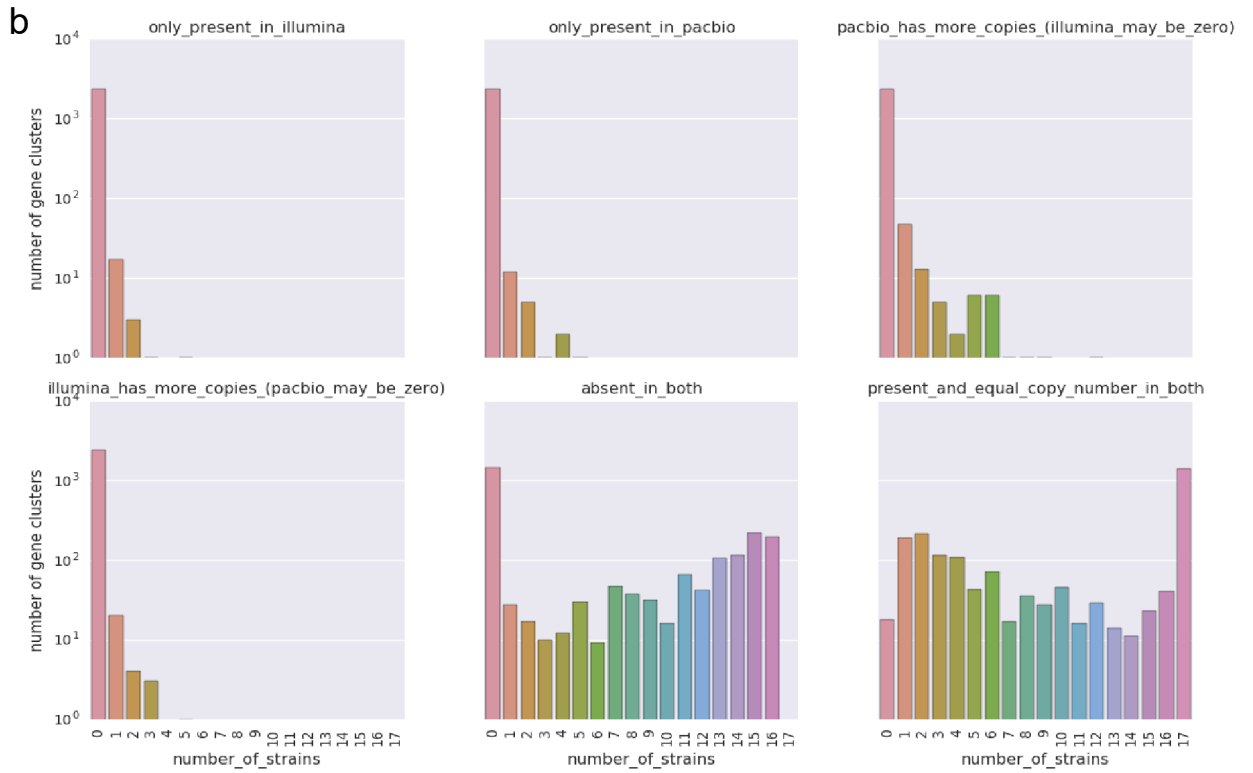

Supplement: mbo004184066sf1.pdf [file mbo004184066sf1.pdf]
