# Supplementary material for: Antagonistic Pleiotropy in the Bifunctional Surface Protein FadL (OmpP1) during Adaptation of Haemophilus influenzae to Chronic Lung Infection Associated with Chronic Obstructive Pulmonary Disease
Source: PubMed Central journal article supplement (PMC6156194; doi:10.1128/mbio.01176-18), 2018-09-25

- CT3
  - CT7
  - CT9
  - CT14
  - CT16
  - CT17
  - CT18
  - CT38
  - CT40
  - CT44
  - CT45
  - CT48
  - CT54
  - CT72
  - CT73
  - CT76
  - CT95
  - CT100
  - CT106
  - CT137
- 
- 1 strains
  - 2 strains
  - 3 strains
  - 4 strains
  - 5 strains
  - 6 strains
  - 7 strains

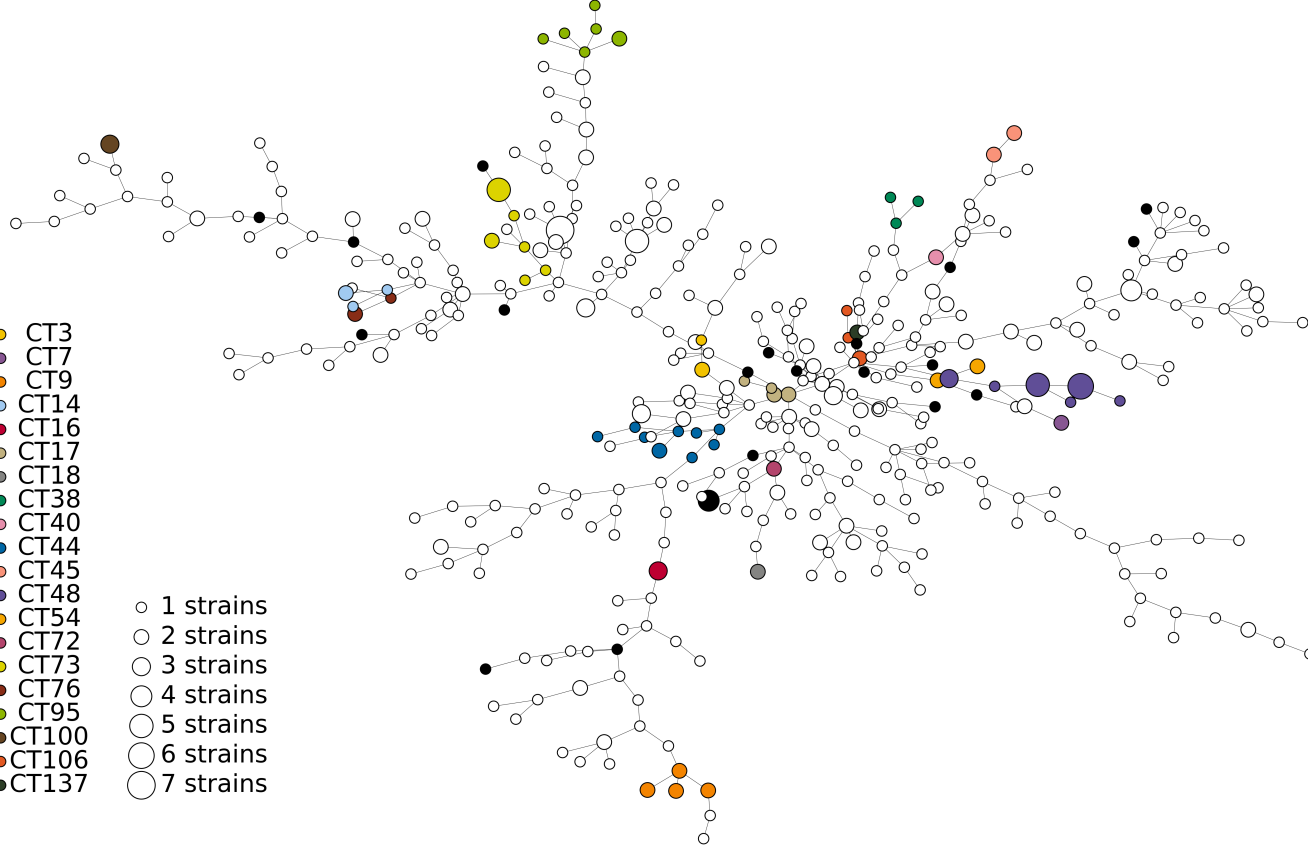

Supplement: mbo004184066sf3.pdf [file mbo004184066sf3.pdf]
